# Supplementary material for: An ultra-low hysteresis, self-healing and stretchable conductor based on dynamic disulfide covalent adaptable networks
Source: Royal Society of Chemistry journal article supplement (doi:10.1039/d1ta08737a), 2021-12-18
Supplement: d1ta08737a1.pdf [file d1ta08737a1.pdf]

## Supporting Information

### **An ultra-low hysteresis, self-healing and stretchable conductor based on dynamic disulfide covalent adaptable networks**

*Weibo Kong,<sup>a</sup> Yunyun Yang,<sup>a,c</sup> Yanjun Wang,<sup>a</sup> Hongfei Cheng,<sup>d</sup> Peiyao Yan,<sup>a</sup> Lei Huang,<sup>a</sup> Jingyi Ning,<sup>a</sup> Fanhao Zeng,<sup>a</sup> Xufu Cai,<sup>\*a</sup> and Ming Wang<sup>\*b</sup>*

## I: Supplementary Tables and Captions

Table S1 Comparison of the state-of-the-art stretchable self-healing conductors

| Matrix                 | Conductive materials | DH (%) | Stretchability (%) | Heal efficiency | Dynamic bonds                         | Heal temperature | Heal time |
|------------------------|----------------------|--------|--------------------|-----------------|---------------------------------------|------------------|-----------|
| PDMS <sup>1</sup>      | AgNWs                | 12     | 100                | N/A             | /                                     | /                | /         |
| PDMS <sup>2</sup>      | Liquid metal         | 0.075  | 100                | N/A             | /                                     | /                | /         |
| Ecoflex <sup>3</sup>   | Carbon black         | 2.41   | 200                | N/A             | /                                     | /                | /         |
| PU <sup>4</sup>        | Graphene             | 7.03   | 100                | N/A             | /                                     | /                | /         |
| PU <sup>5</sup>        | Liquid metal         | 52.84  | 500                | 78%             | Hydrogen bonds                        | 60°C             | 1.5 H     |
| PU <sup>6</sup>        | Au                   | 49.71  | 200                | 100%            | Quadrupolar hydrogen bonds            | RT               | 48 H      |
| PU <sup>7</sup>        | AgNP layer           | 40.19  | 100                | 95%             | Metal coordination bonds              | 70°C             | 48 H      |
| PU <sup>8</sup>        | Au                   | 62.04  | 1130               | 90%             | Hydrogen bonds and coordination bonds | RT               | 48 H      |
| PNIPAM <sup>9</sup>    | Graphene             | 22.78  | 300                | 96%             | Hydrogen bonds                        | RT               | 2 H       |
| Hydrogel <sup>10</sup> | Ionic                | 25.88  | 1000               | 90%             | Hydrogen bonds                        | RT               | 80 Min    |
| PAA <sup>11</sup>      | GO/Ca <sup>2+</sup>  | 33.54  | 800                | 88.0%           | Hydrogen bonds and coordination bonds | RT               | 20 H      |
| ENR <sup>12</sup>      | CNT layer            | 41.32  | 100                | 91%             | Boroxine                              | RT               | /         |
| ENR <sup>13</sup>      | CNT                  | 70.41  | 100                | 93%             | Hydrogen bonds                        | RT               | /         |
| PU (this work)         | Au                   | 3.8    | 100                | 100%            | Hydrogen bonds and disulfide bonds    | 130°C            | 1H        |

PDMS : polydimethylsiloxane ; PU: polyurethane; ENR: epoxidized natural rubber; PNIPAM: polyisopropylacrylamide; PAA: polyacrylic acid;

Table S2 The chemical composition of PUs

| Sample  | IPDI(g) | PTMG1000(g) | TEA(g) | HEDS(g) | HDO(g) |
|---------|---------|-------------|--------|---------|--------|
| PU-0    | 6.23    | 10          | 0      | 1.5425  | 0.9453 |
| PU-1    | 5.35    | 10          | 0.3978 | 1.5425  | 0      |
| PU-2    | 6.23    | 10          | 0.7957 | 1.5425  | 0      |
| PU-3    | 8.90    | 10          | 1.9892 | 1.5425  | 0      |
| Control | 6.23    | 10          | 0.7957 | 0       | 1.182  |

## II: Supplementary Figures and Captions

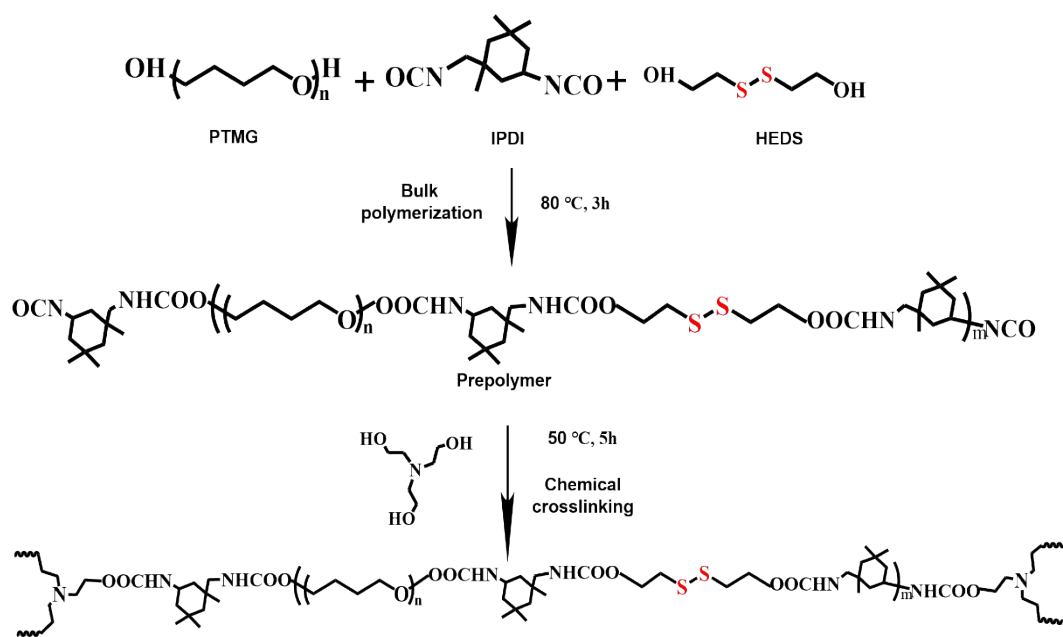

Fig. S1 The detailed synthetic route of PUs.

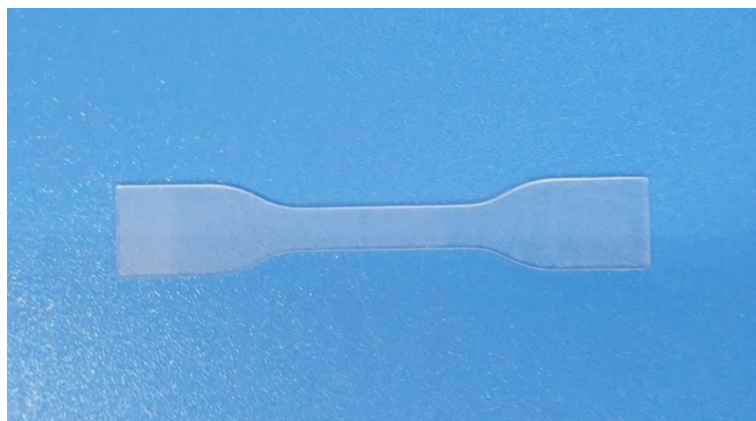

Fig. S2 The photograph of PU-2.

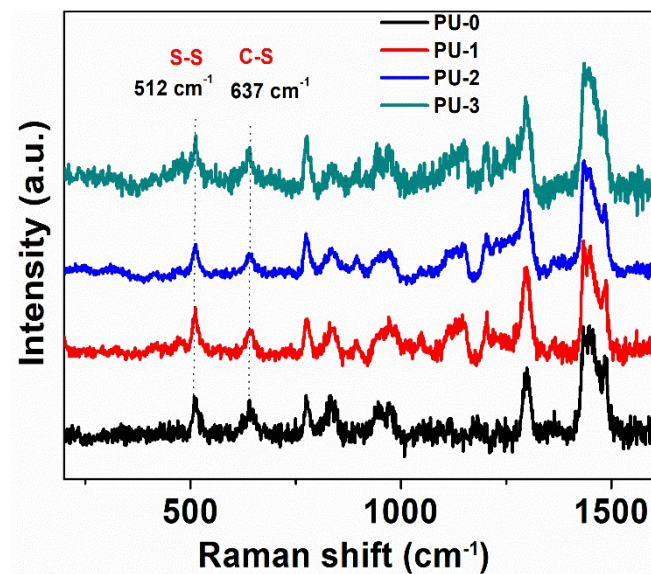

Fig. S3 Raman shift of the PU-0, PU-1, PU-2 and PU-3 samples with different weight ratios (0%, 2.30%, 4.29%, and 8.88%) of TEA crosslinkers.

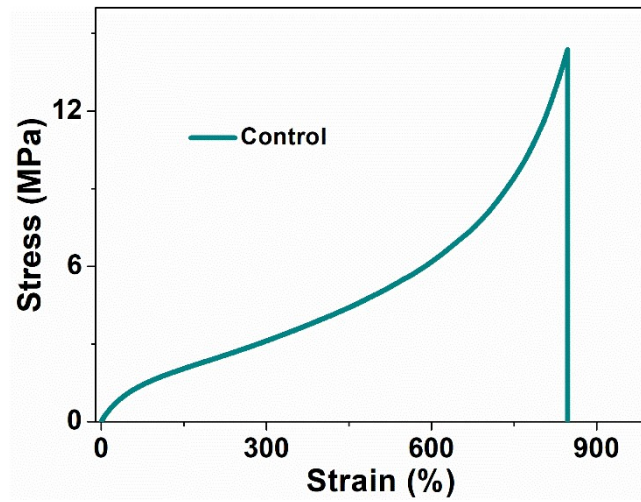

Fig. S4 The stress-strain curve of control sample under the stretching rate of 40 mm/min at room temperature.

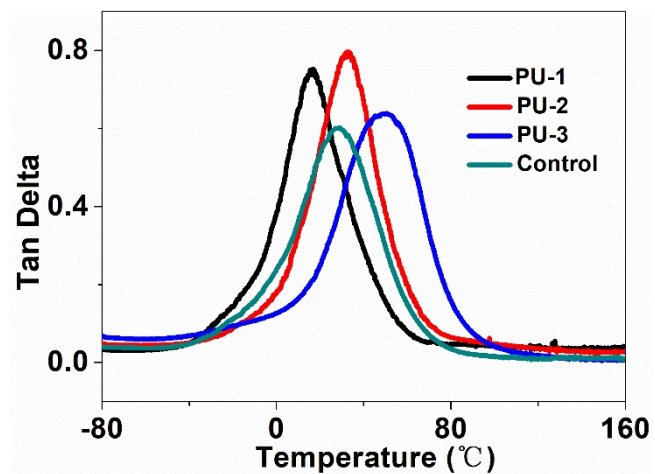

Fig. S5 Tan delta of PUs and control sample detected by DMA multiple strain model under heating rate of 5 °C/ min in temperature range of -80 °C ~ 160 °C.



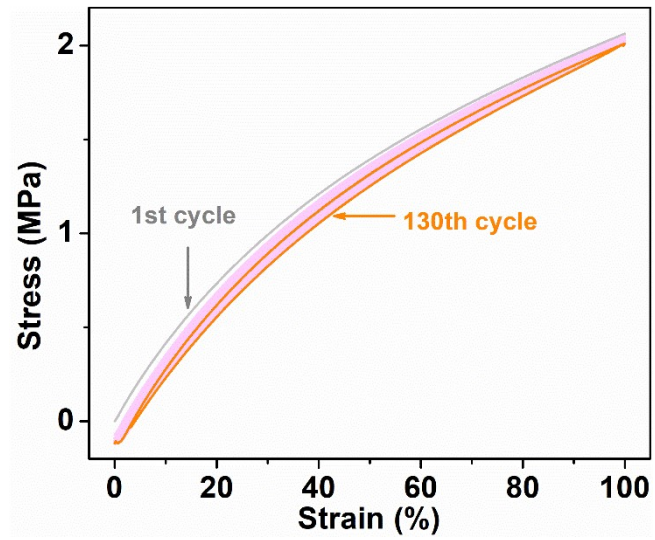

Fig. S6 Cyclic test of PU-2 at strain of 100% for 130 times.

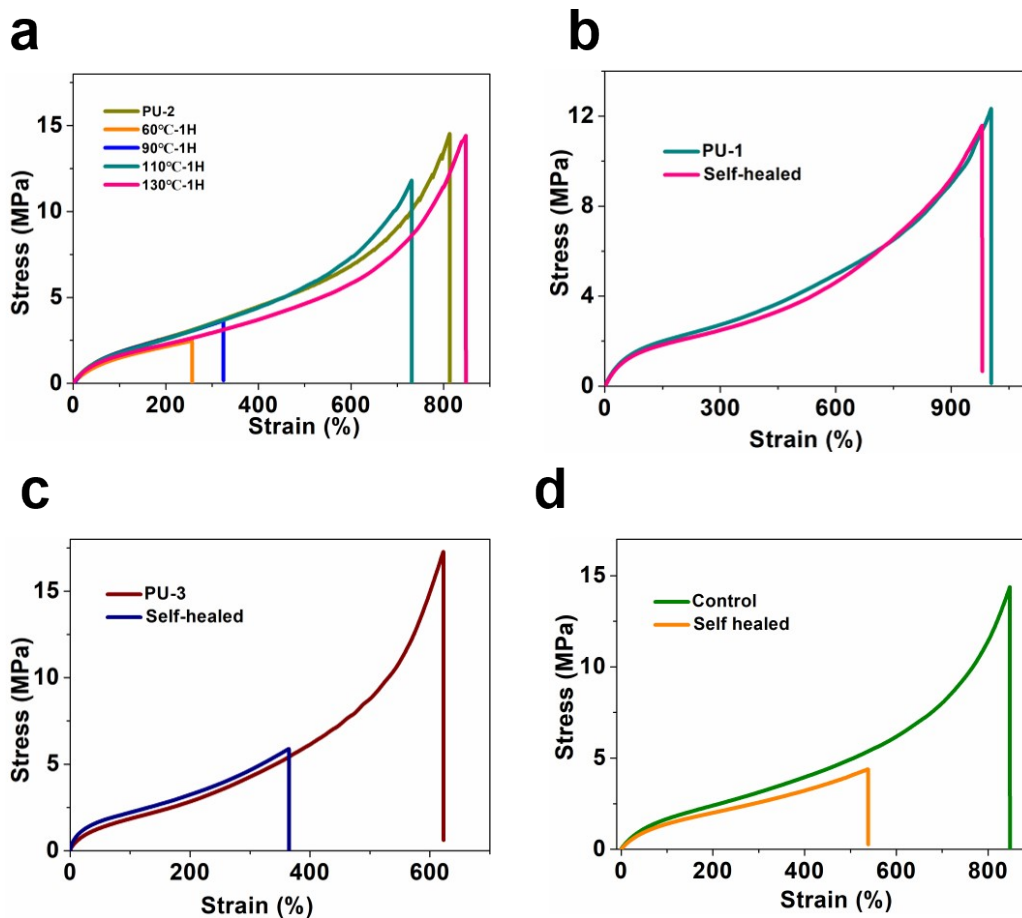

Fig. S7 (a) Stress-strain curves of the healed PU-2 at different temperature. (b)-(c) Stress-strain curves of original and self-healed PU-1 (b), PU-3 (c) and control (d) samples.

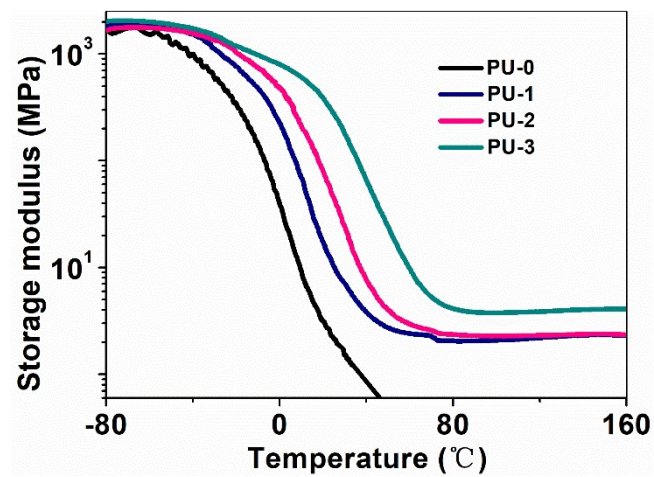

Fig. S8 Storage modulus of the PUs in the temperature range of -80 °C ~ 160 °C at a heating rate of 5 °C/min under 1 Hz.

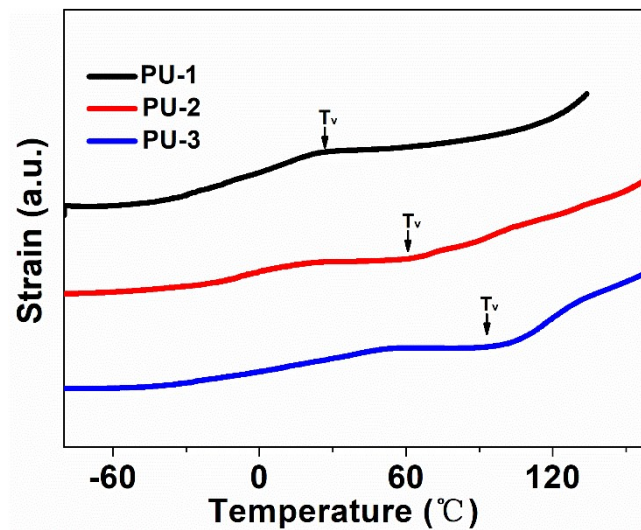

Fig. S9 Dilatometry tests of PUs under the DMA controlled force model under 0.1 MPa.

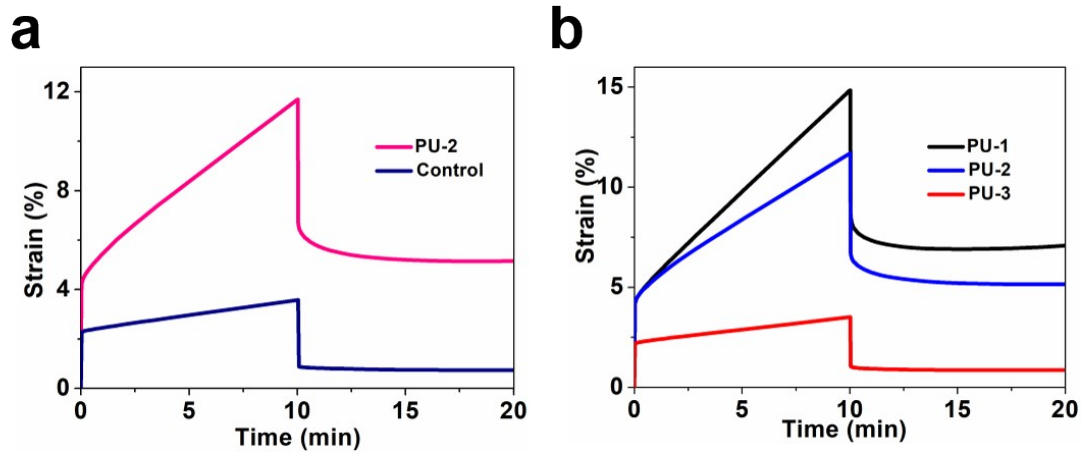

Fig. S10 reep curves of control sample (a) and PUs samples (b) at 150 °C.

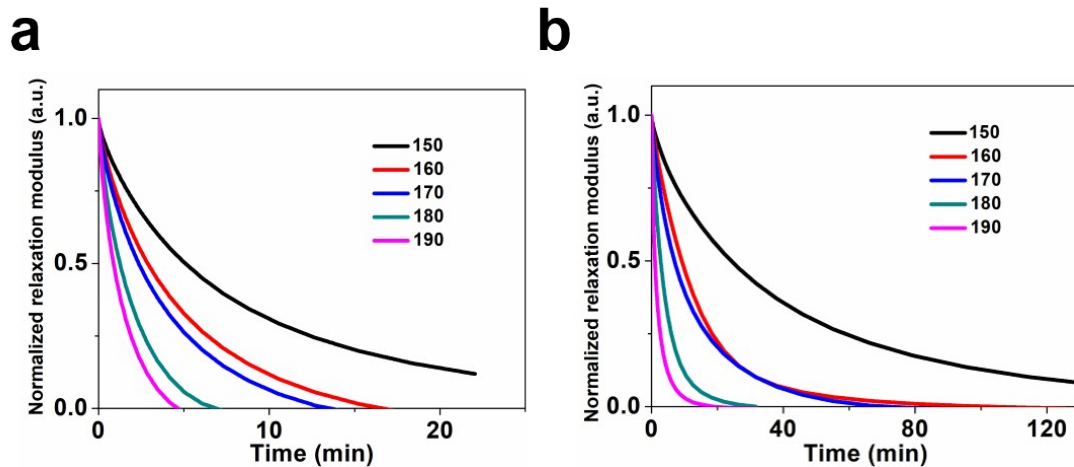

Fig. S11 Normalized stress relaxation curves of PU-1 (a) and PU-3 (b) under 5% of strain at different temperature.

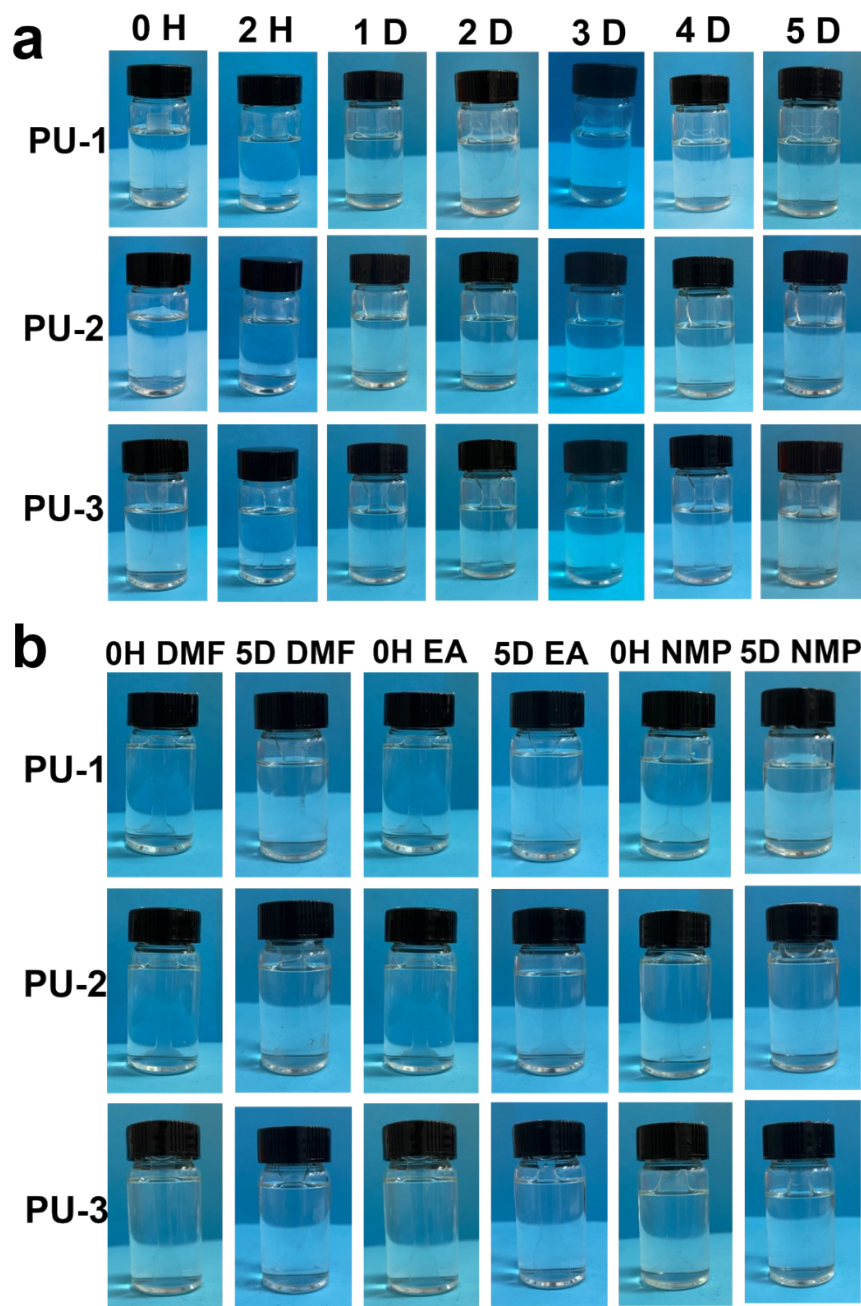

Fig. S12 (a) The photographs of PU-1, PU-2 and PU-3 in THF for different time. (b) The photographs of PU-1, PU-2 and PU-3 in DMF, EA and NMP for 5days.

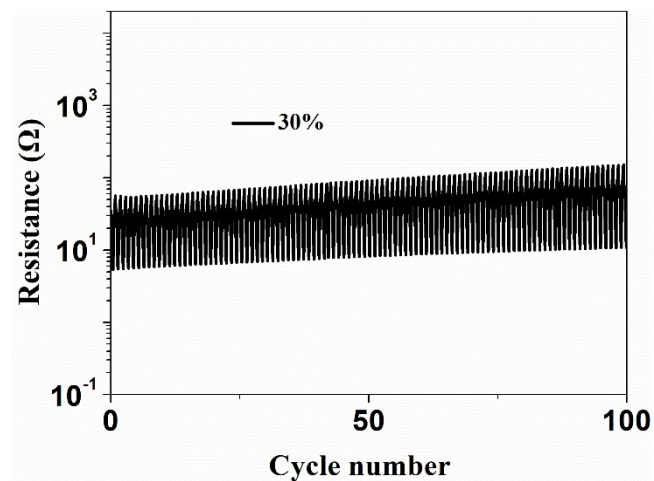

Fig. S13 Durability tests of 100 cycles at a maximum tensile strain of 30% for PU-2-based stretchable conductors.



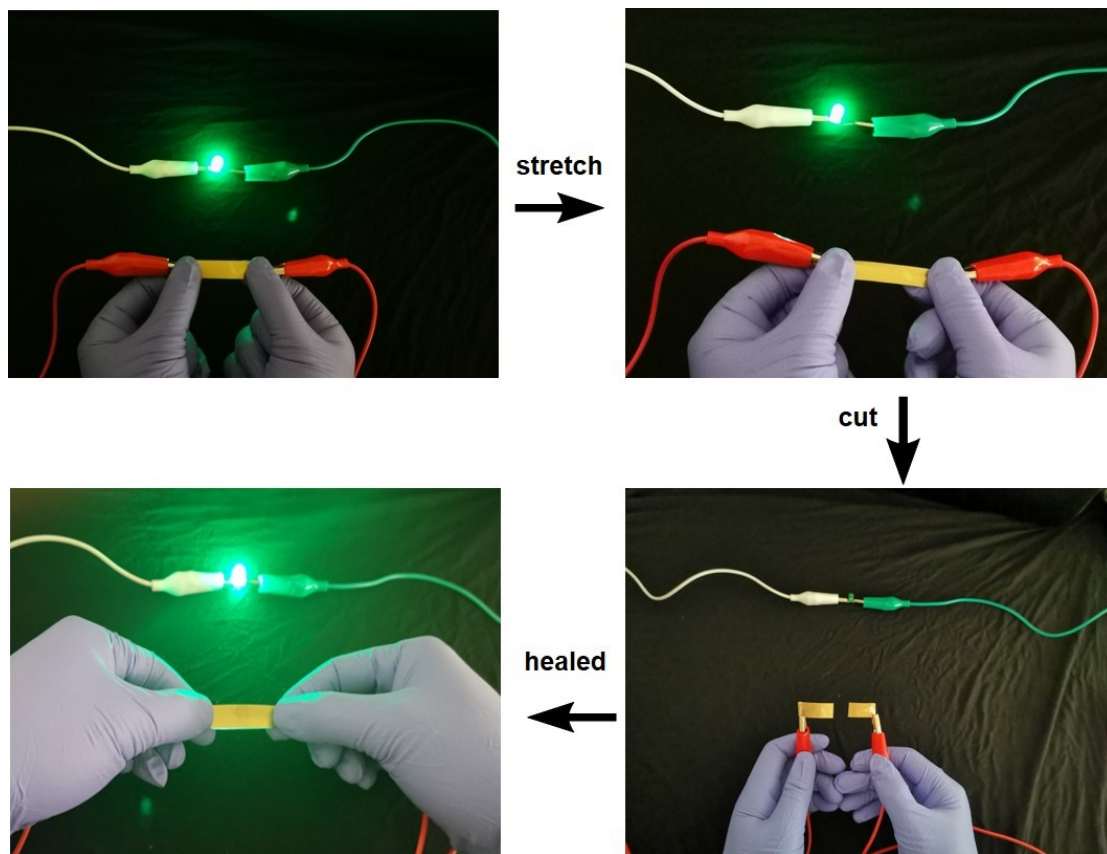

Fig. S14 Demonstration of the self-healing process of fabricated conductor connect with LED.

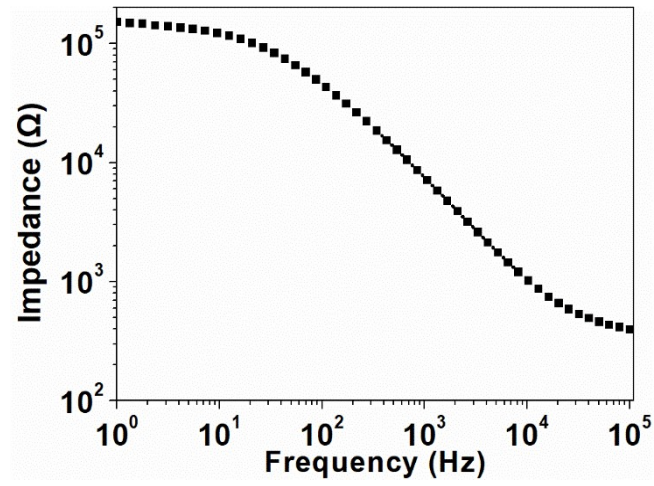

Fig. S15 The fabricated stretchable conductor showing low interfacial impedance with skin.

## References:

- [1] H. Kim, A. Thukral, C. Yu, *ACS Appl. Mater. Inter.*, 2018, **10**, 5000.
- [2] Y. Wu, Y. Zhou, W. Asghar, Y. Liu, F. Li, D. Sun, C. Hu, Z. Wu, J. Shang, Z. Yu, R. Li, H. Yang, *Adv. Intell. Syst.*, 2021, 2000235.
- [3] P. Lugoda, J. C. Costa, L. A. Garcia Garcia, A. Pouryazdan, Z. Jocy, F. Spina, J. Salvage, D. Roggen, N. Münzenrieder, *Adv. Mat. Technol.*, 2021, **6**, 2000780.
- [4] X. Li, T. Hua, B. Xu, *Carbon.*, 2017, **118**, 686.
- [5] J. Kang, D. Son, G. J. N. Wang, Y. Liu, J. Lopez, Y. Kim, J. Y. Oh, T. Katsumata, J. Mun, Y. Lee, L. Jin, J. B. H. Tok, Z. Bao, *Adv. Mater.*, 2018, **30**, 1706846.
- [6] X. Yan, Z. Liu, Q. Zhang, J. Lopez, H. Wang, H. Wu, S. Niu, H. Yan, S. Wang, T. Lei, J. Li, D. Qi, P. Huang, J. Huang, Y. Zhang, Y. Wang, G. Li, J. B. H. Tok, X. Chen, Z. Bao, *J. Am. Chem. Soc.*, 2018, **140**, 5280.
- [7] J. Fan, J. Huang, Z. Gong, L. Cao, Y. Chen, *ACS Appl. Mater. Inter.*, 2021, **13**, 1135.
- [8] X. Wu, J. Wang, J. Huang, S. Yang, *ACS Appl. Mater. Inter.*, 2019, **11**, 7387.
- [9] S. Yan, G. Zhang, H. Jiang, F. Li, L. Zhang, Y. Xia, Z. Wang, Y. Wu, H. Li, *ACS Appl. Mater. Inter.*, 2019, **11**, 10736.
- [10] H. Qiao, P. Qi, X. Zhang, L. Wang, Y. Tan, Z. Luan, Y. Xia, Y. Li, K. Sui, *ACS Appl. Mater. Inter.*, 2019, **11**, 7755.
- [11] Y. Wang, Q. Chang, R. Zhan, *J. Mater. Chem. A*, 2019, **7**, 24814-24829.
- [12] Q. Guo, B. Huang, C. Lu, T. Zhou, G. Su, L. Jia, X. Zhang, *Mater. Horizons.*, 2019, **6**, 996.
- [13] J. Cao, C. Lu, J. Zhuang, M. Liu, X. Zhang, Y. Yu, Q. Tao, *Angew. Chem. Int. Ed.*, 2017, **56**, 8795.
